# Supplementary material for: Efficient Sensor Placement for Leak Localization Considering Uncertainties
Source: Springer Nature journal article supplement (doi:10.1007/s11269-016-1504-6), 2016-10-04
Supplement: MOESM1 [file 11776516]

## **Supplementary Material to "Efficient Sensor Placement for Leak Localization Considering Uncertainties"**

**David B. Steffelbauer · Daniela Fuchs-Hanusch**

Received: date / Accepted: date

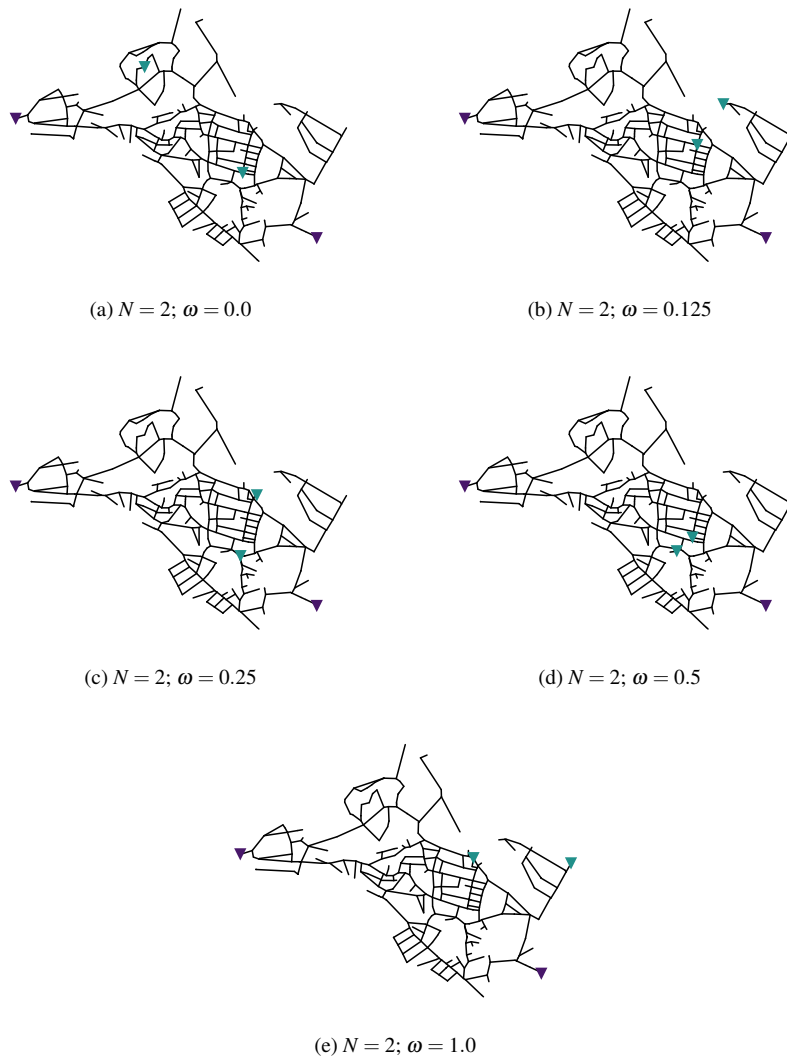

Fig. 1: Sensor positions (green triangles) resulting from the enhanced sensor placement algorithm described for two additional placed sensors and different weighting factors  $\omega$ . Already installed sensors at the inflow and outflow point of the DMA are depicted as purple triangles.

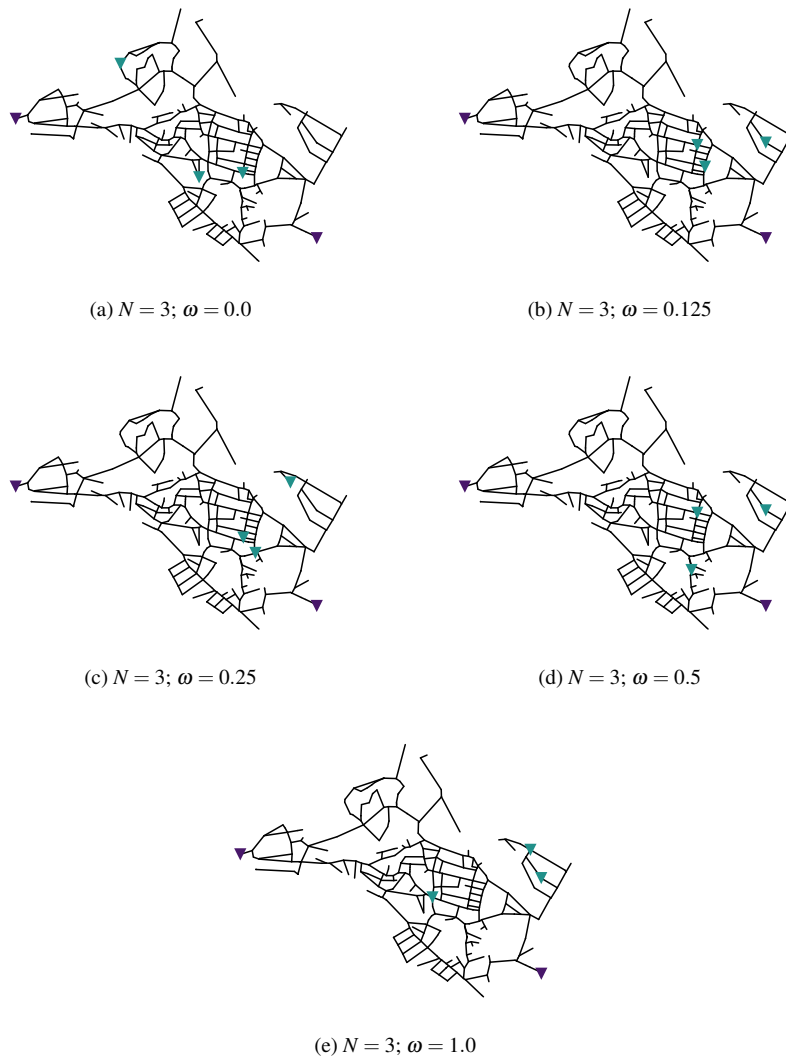

Fig. 2: Sensor positions (green triangles) resulting from the enhanced sensor placement algorithm described for three additional placed sensors and different weighting factors  $\omega$ . Already installed sensors at the inflow and outflow point of the DMA are depicted as purple triangles.

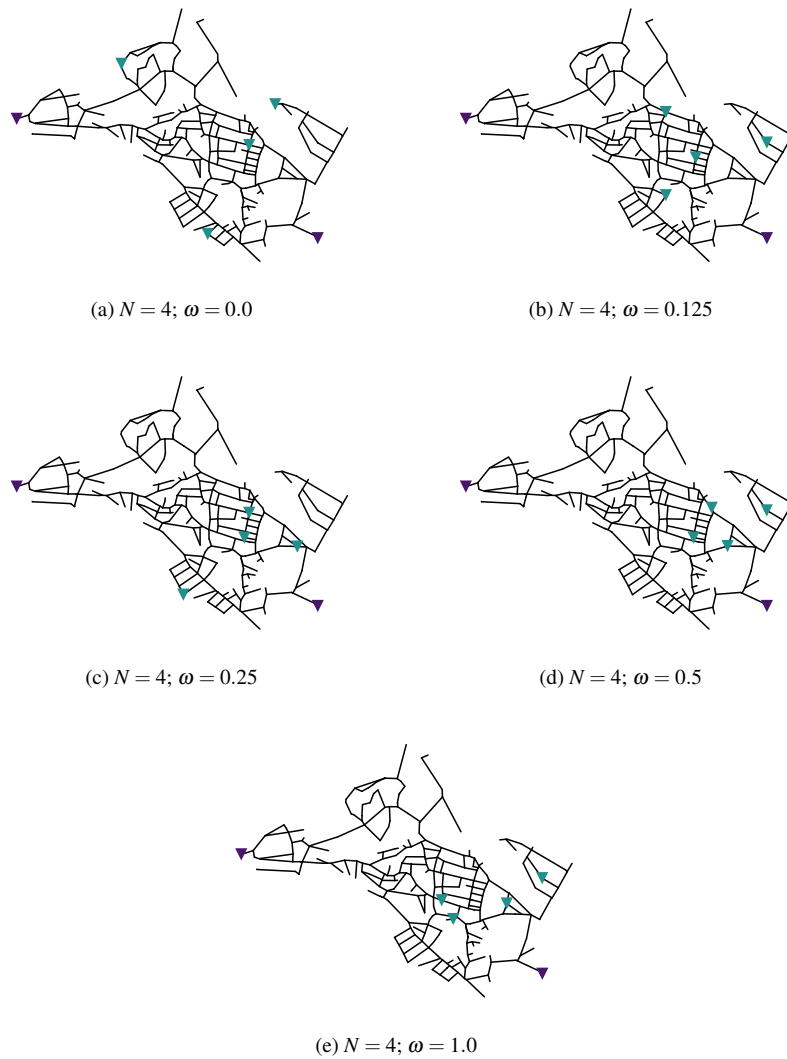

Fig. 3: Sensor positions (green triangles) resulting from the enhanced sensor placement algorithm described for four additional placed sensors and different weighting factors  $\omega$ . Already installed sensors at the inflow and outflow point of the DMA are depicted as purple triangles.

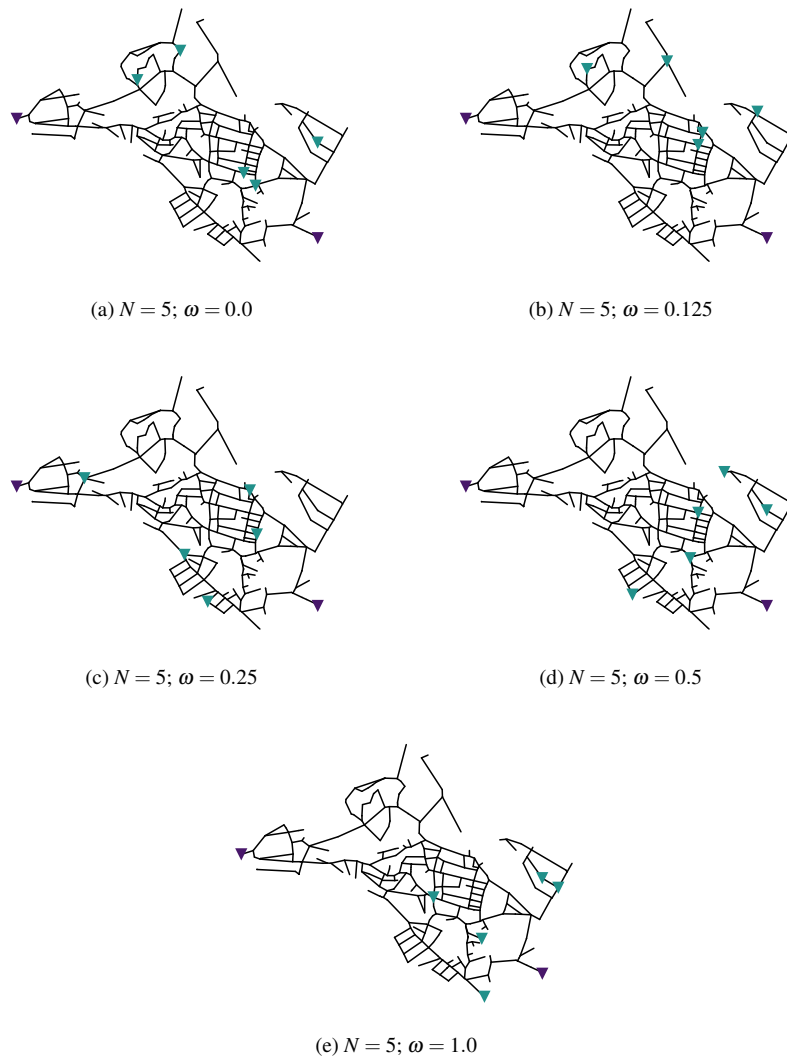

Fig. 4: Sensor positions (green triangles) resulting from the enhanced sensor placement algorithm described for five additional placed sensors and different weighting factors  $\omega$ . Already installed sensors at the inflow and outflow point of the DMA are depicted as purple triangles.

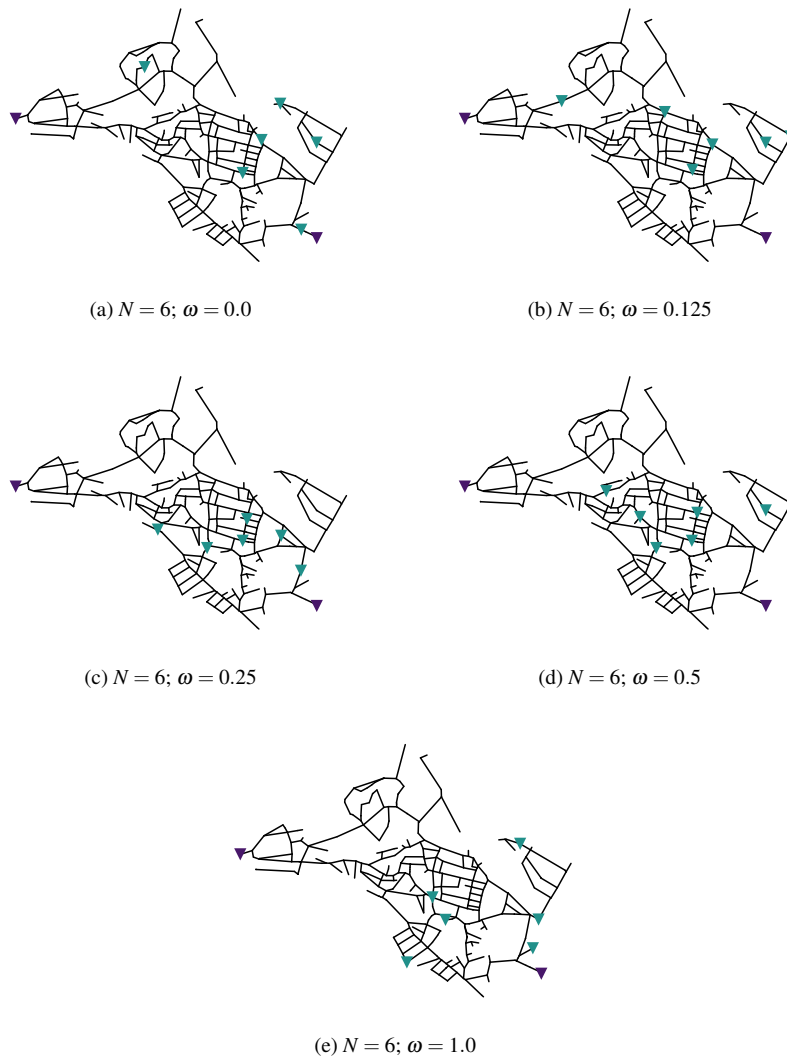

Fig. 5: Sensor positions (green triangles) resulting from the enhanced sensor placement algorithm described for six additional placed sensors and different weighting factors  $\omega$ . Already installed sensors at the inflow and outflow point of the DMA are depicted as purple triangles.

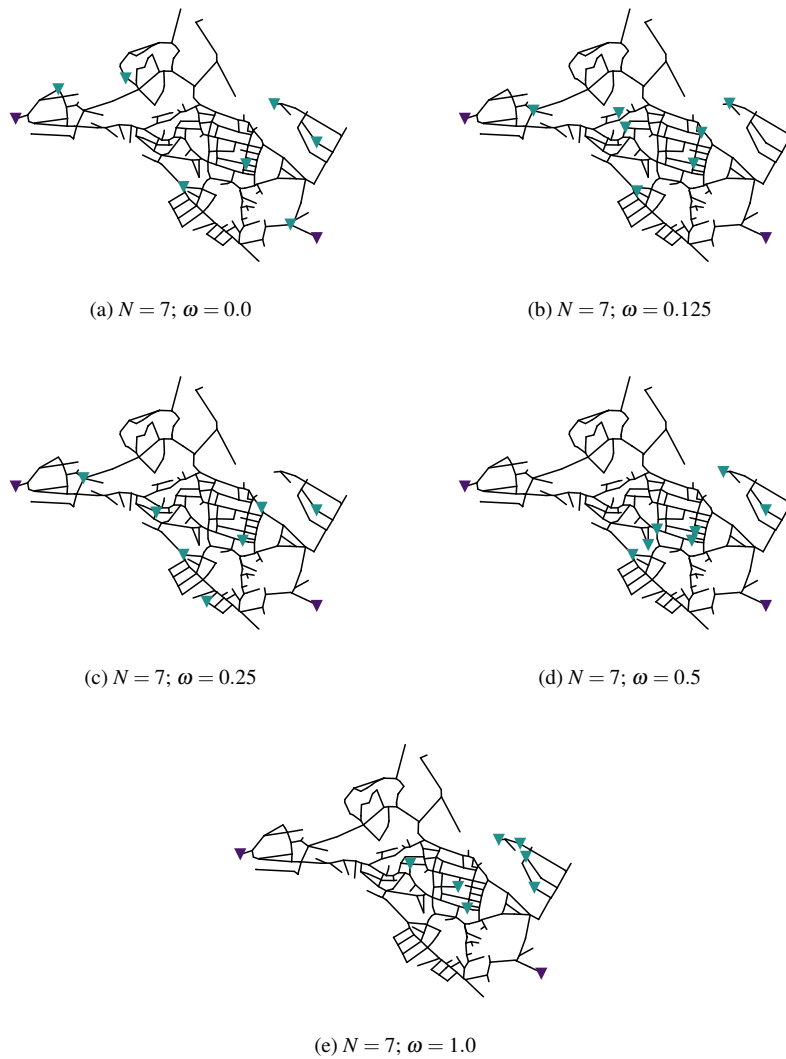

Fig. 6: Sensor positions (green triangles) resulting from the enhanced sensor placement algorithm described for seven additional placed sensors and different weighting factors  $\omega$ . Already installed sensors at the inflow and outflow point of the DMA are depicted as purple triangles.

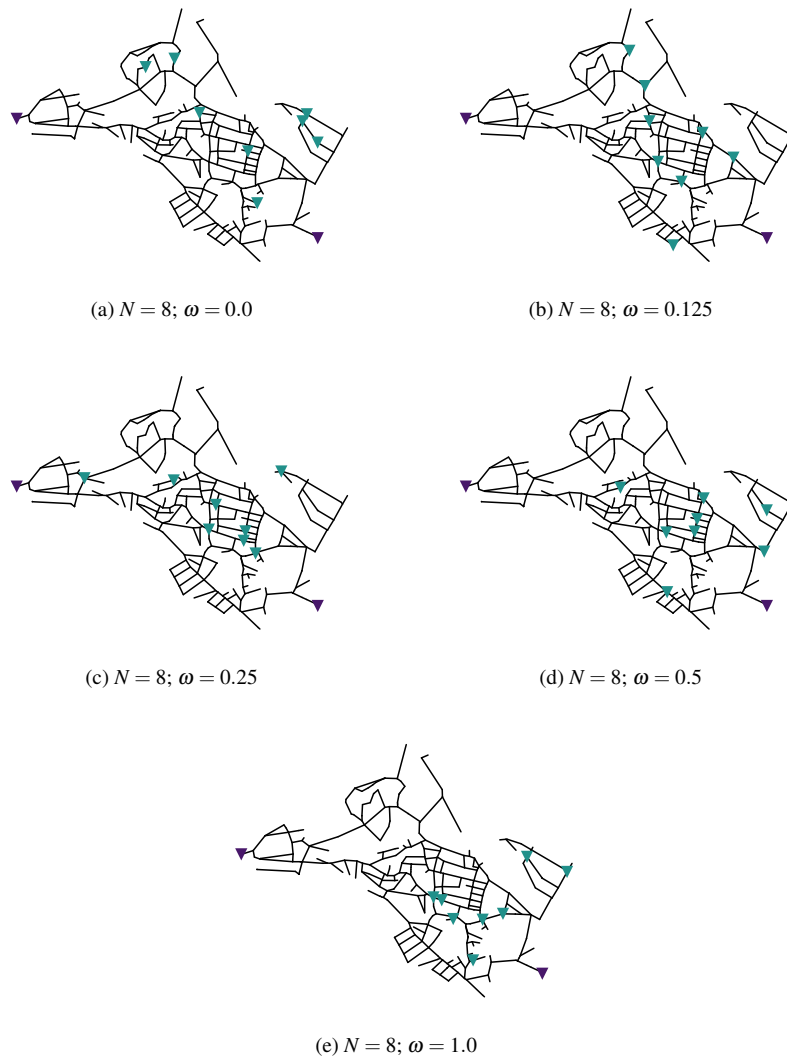

Fig. 7: Sensor positions (green triangles) resulting from the enhanced sensor placement algorithm described for eight additional placed sensors and different weighting factors  $\omega$ . Already installed sensors at the inflow and outflow point of the DMA are depicted as purple triangles.



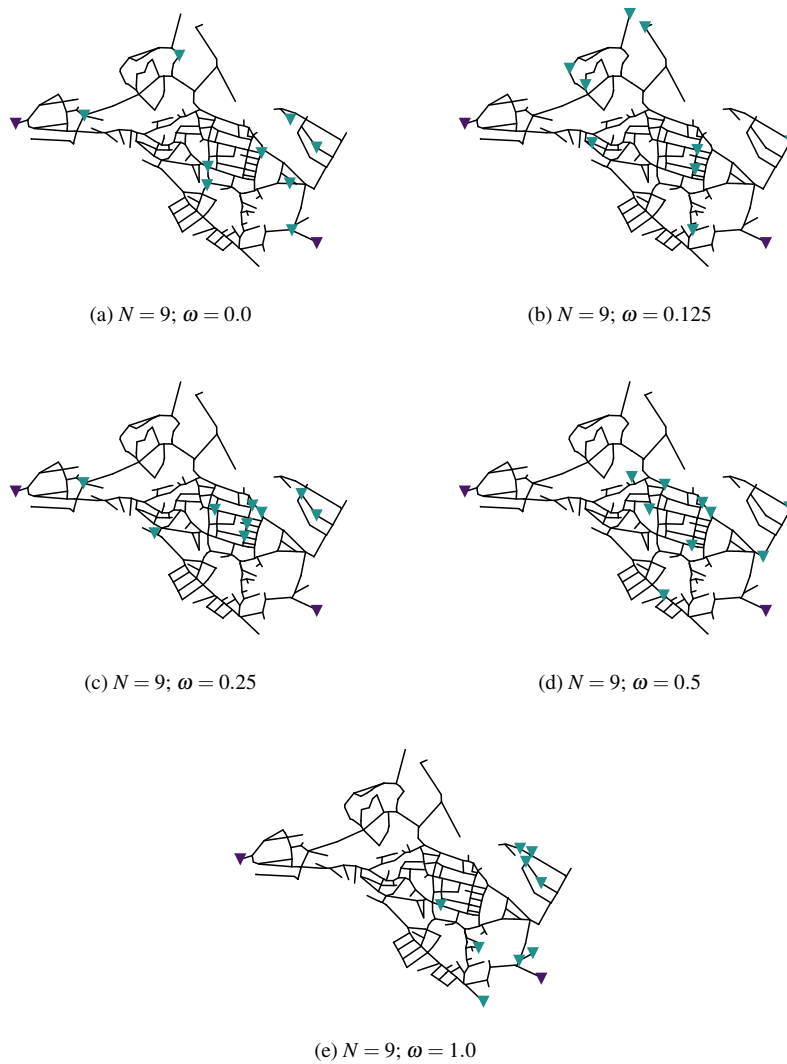

Fig. 8: Sensor positions (green triangles) resulting from the enhanced sensor placement algorithm described for nine additional placed sensors and different weighting factors  $\omega$ . Already installed sensors at the inflow and outflow point of the DMA are depicted as purple triangles.

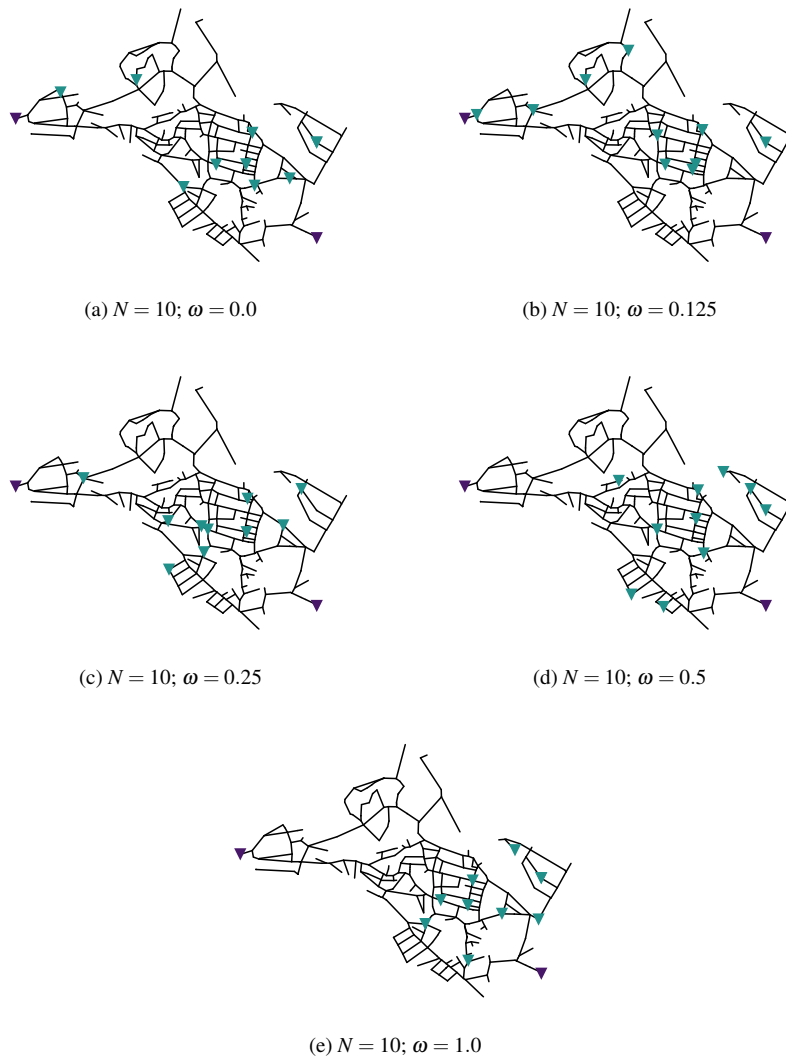

Fig. 9: Sensor positions (green triangles) resulting from the enhanced sensor placement algorithm described for ten additional placed sensors and different weighting factors  $\omega$ . Already installed sensors at the inflow and outflow point of the DMA are depicted as purple triangles.
